# Supplementary material for: Does Elemental Sulfur Act as an Effective Measure to Control the Seasonal Growth Dynamics of Potato Tubers (Solanum tuberosum L.)?
Source: MDPI journal article supplement (doi:10.3390/plants11030248), 2022-01-18
Supplement: s1 [file s1]

Supplementary Materials

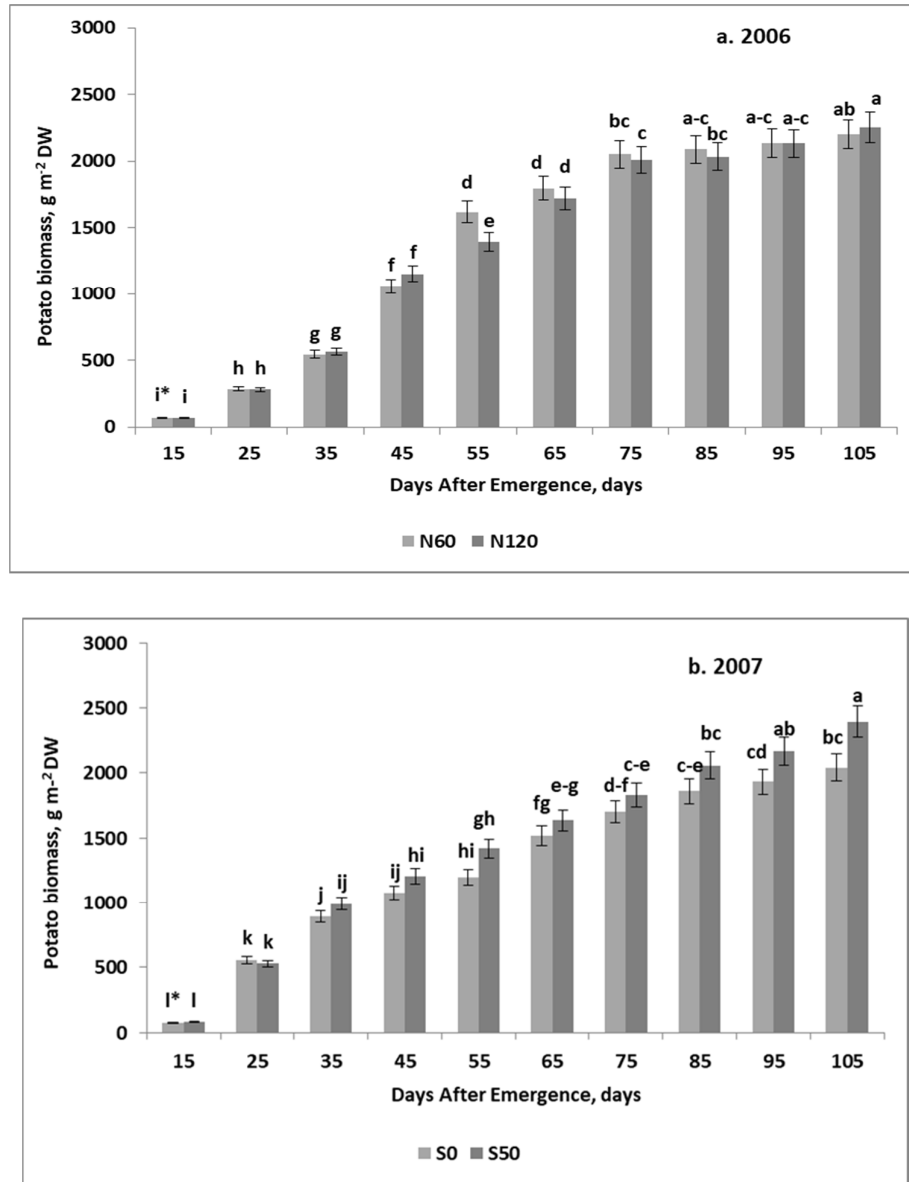

**Figure S1.** Seasonal trends of potato biomass growth. (a) 2006; (b) 2007. \* HSD—calculated separately for each year; letters indicate significant differences between treatments ( $p < 0.05$ ). Legend: S0, S50—sulfur rates of 0 and 50 kg ha<sup>-1</sup>. Vertical bars represent standard error.

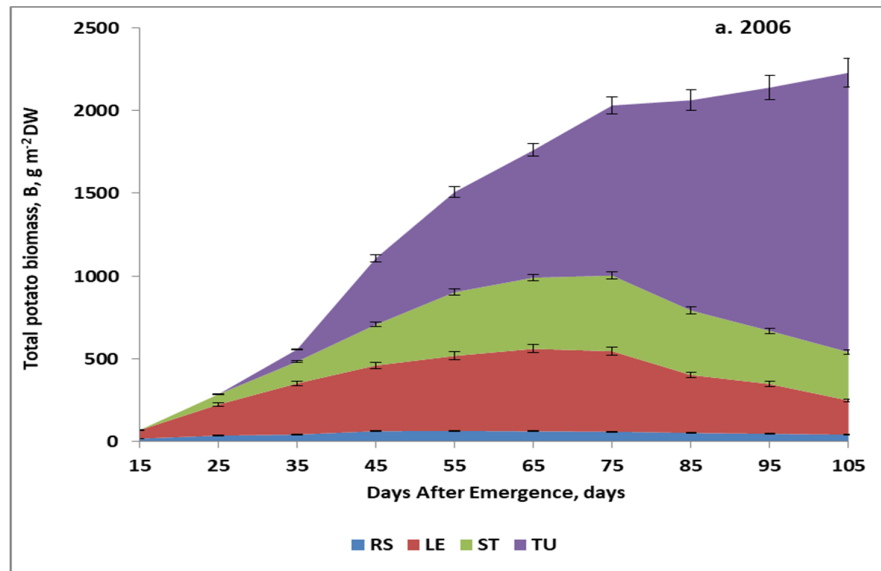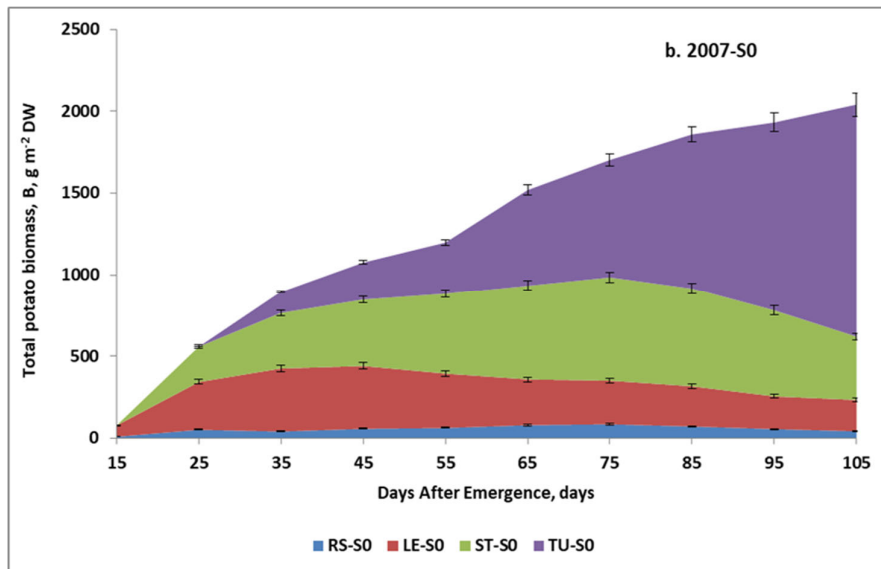

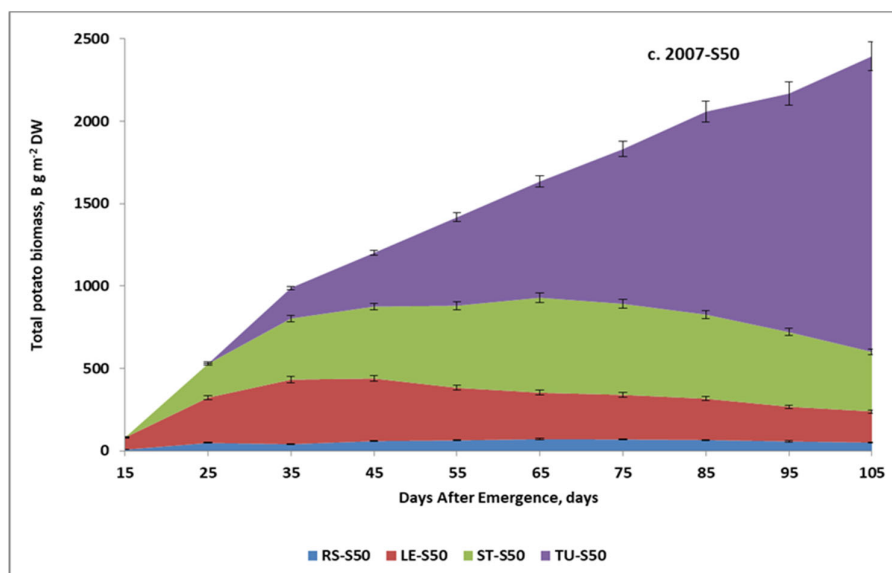

**Figure S2.** Trends in the potato biomass increase and partitioning between organs. (a) 2006; (b) 2007-S0; (c) 2007-S50. Legend: N60, N120—nitrogen rates of 60 and 120  $\text{kg ha}^{-1}$ ; S0, S50—sulfur rates of 0 and 50  $\text{kg ha}^{-1}$ . Vertical bars represent standard error.

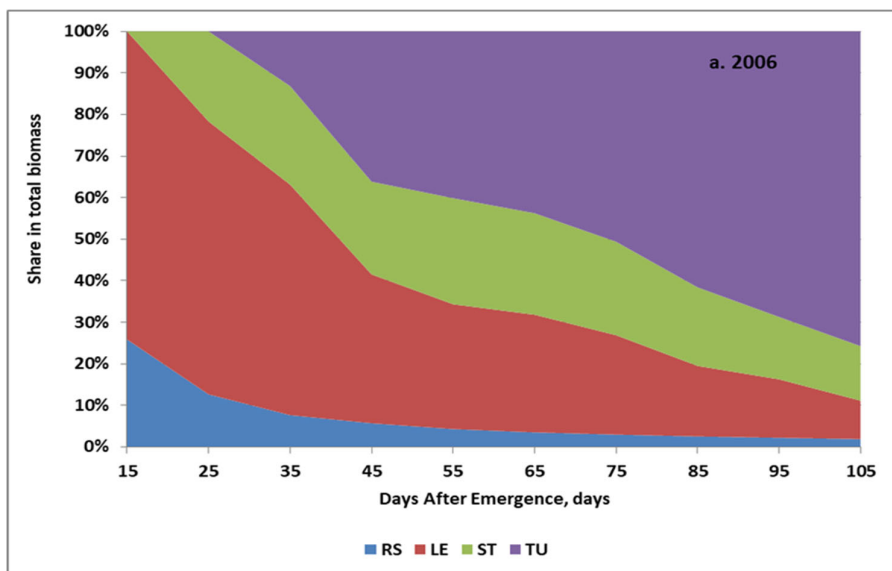

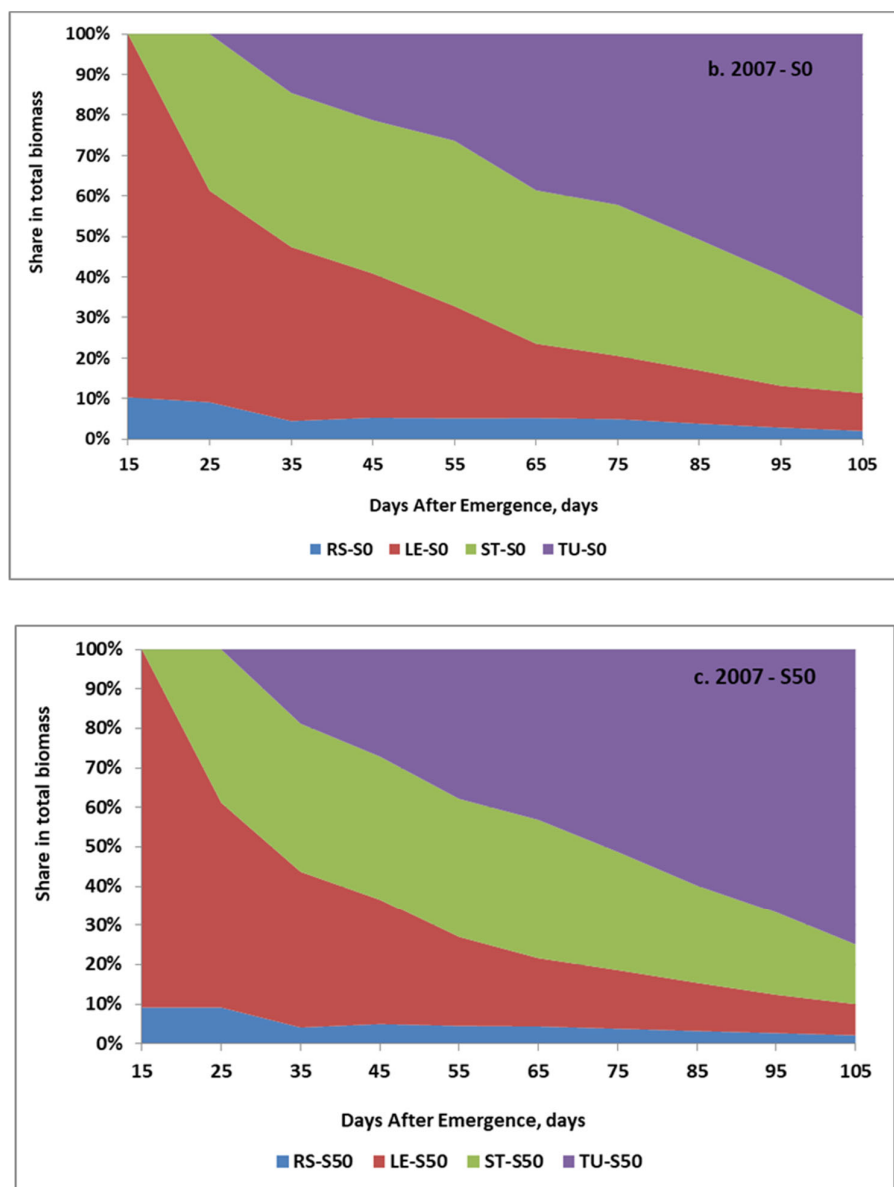

**Figure S3.** Seasonal variability in the relative share of potato organs in the total biomass. (a) 2006; (b) 2007-S0; (c) 2007-S50. Legend: RS—roots and stolons, LE—leaves, ST—stems, TU—tubers; S0, 50—sulfur rates of 0.50 kg ha<sup>-1</sup>.
